# Supplementary material
Source: PubMed Central journal article supplement (PMC6939344)
Supplement: NIHMS1064980-supplement-1.pdf [file NIHMS1064980-supplement-1.pdf]

**Table S1.** Indications for CRRT initiation in the post-intervention group.

| Indication for CRRT*    | After Intervention<br>N = 122 |
|-------------------------|-------------------------------|
| Acidosis                | 41 (33.6)                     |
| Electrolyte abnormality | 40 (32.8)                     |
| Volume overload         | 57 (46.7)                     |
| Oliguria/Anuria         | 55 (45.1)                     |
| Uremia                  | 7 (5.7)                       |
| Other                   | 7 (5.7)                       |

Numbers given are figures and percents, unless otherwise specified.

\* In most cases, the indication for CRRT was multifactorial, so the categories are not mutually exclusive. This is why the percentages add to above 100%
